# Supplementary material
Source: MDPI journal article supplement (https://www.mdpi.com/2073-4441/15/10/1821)
Supplement: s1 [file s1]

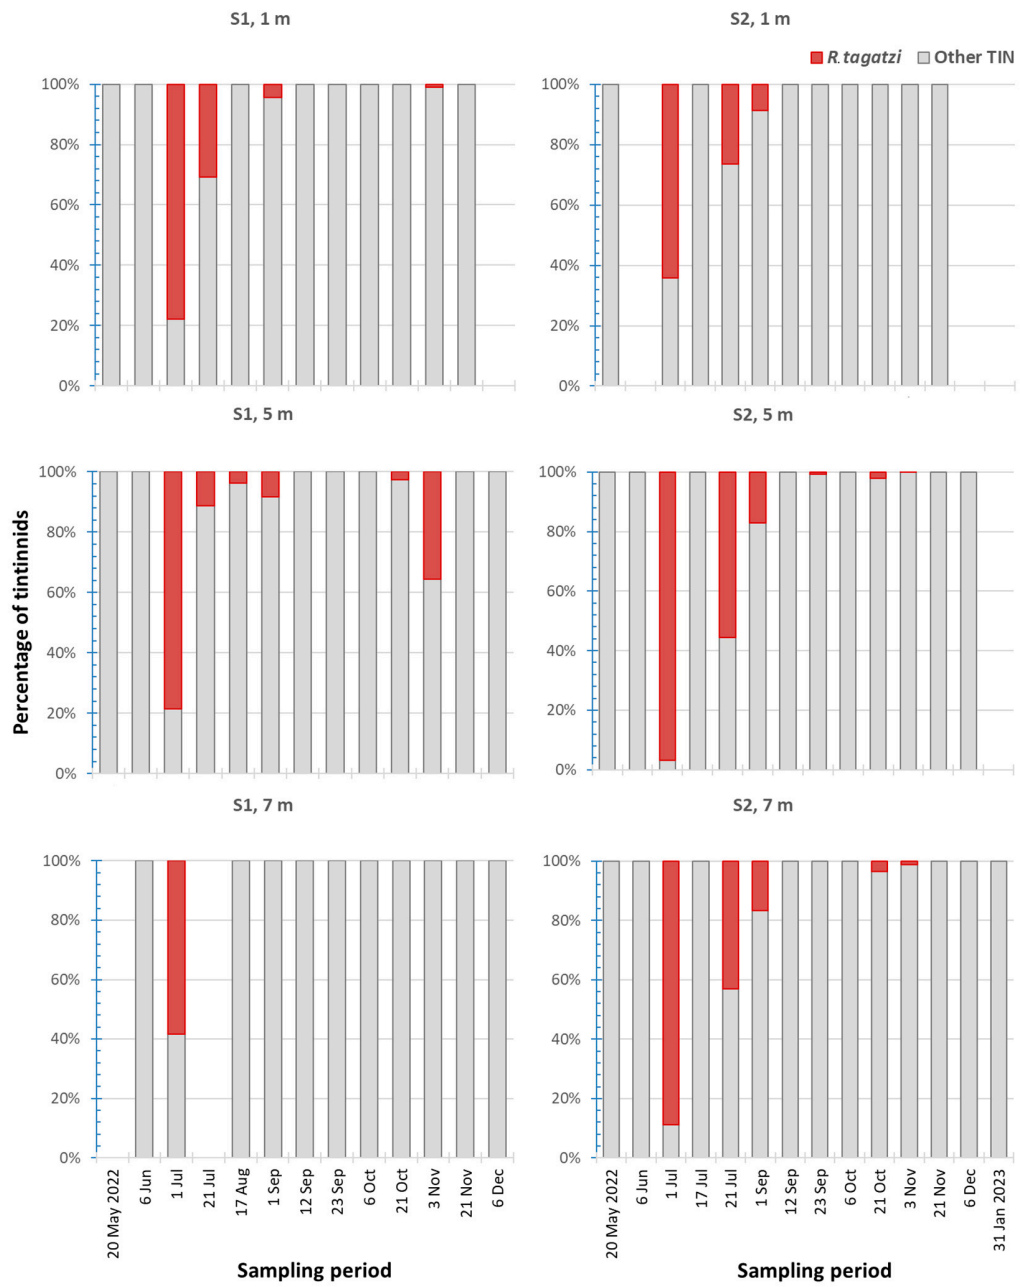

**Figure S1.** Relative abundance of *Rhizodomus tagatzii* in tintinnid community at two stations and three sampling depths in the Neretva River estuary from May 2022 to January 2023

**Table S1.** List of the tintinnid taxa identified at two stations in the Neretva River estuary in the period from May 2022 to January 2023. (+, present; blank, absent).

|                                                                                        | Station: | S1        | S2        |
|----------------------------------------------------------------------------------------|----------|-----------|-----------|
| <b>TINTINNIDA</b>                                                                      |          |           |           |
| <i>Codonella aspera</i> Kofoid and Campbell, 1929                                      |          | +         | +         |
| <i>Tintinnopsis angulata</i> Daday, 1887                                               |          | +         |           |
| <i>Tintinnopsis beroidea</i> Stein, 1867                                               |          | +         |           |
| <i>Tintinnopsis campanula</i> (Ehrenberg) Daday, 1887                                  |          | +         | +         |
| <i>Tintinnopsis compressa</i> (Daday) Laackmann, 1913                                  |          | +         | +         |
| <i>Tintinnopsis cylindrica</i> Daday, 1887                                             |          | +         | +         |
| <i>Tintinnopsis fennica</i> Kofoid and Campbell, 1929                                  |          | +         |           |
| <i>Tintinnopsis fracta</i> Brandt, 1906                                                |          | +         | +         |
| <i>Tintinnopsis karajacensis</i> Brandt, 1896                                          |          | +         | +         |
| <i>Tintinnopsis levigata</i> Kofoid and Campbell, 1929                                 |          | +         | +         |
| <i>Tintinnopsis nana</i> Lohmann, 1908                                                 |          | +         | +         |
| <i>Tintinnopsis radix</i> (Imhof) Brandt, 1907                                         |          | +         | +         |
| <i>Codonellopsis schabi</i> (Brandt) Kofoid and Campbell, 1929                         |          | +         | +         |
| <i>Stenosemella nivalis</i> (Meunier) Kofoid and Campbell, 1929                        |          | +         | +         |
| <i>Stenosemella ventricosa</i> (Claparède and Lachmann) Jörgensen, 1924                |          | +         | +         |
| <i>Helicostomella subulata</i> (Ehrenberg) Jörgensen, 1924                             |          | +         | +         |
| <i>Metacylis</i> sp. Jörgensen, 1924                                                   |          | +         | +         |
| <i>Metacylis joergenseni</i> (Cleve) Kofoid and Campbell, 1929                         |          | +         | +         |
| <i>Petalotricha ampulla</i> (Fol) Kent, 1882                                           |          | +         |           |
| <i>Favella adriatica</i> (Imhof) Jörgensen, 1924                                       |          | +         | +         |
| <i>Favella ehrenbergii</i> (Claparède and Lachmann) Jörgensen, 1924                    |          | +         | +         |
| <i>Favella taraikaensis</i> Hada, 1932                                                 |          | +         | +         |
| <i>Epiplocyilis undella</i> (Ostenfeld and Schmidt) Balech, 1962                       |          | +         |           |
| <i>Rhabdonella spiralis</i> (Fol) Brandt, 1907                                         |          | +         |           |
| <i>Undellopsis marsupialis</i> (Brandt) Kofoid and Campbell, 1929                      |          | +         |           |
| <i>Dictyocysta elegans</i> Ehrenberg, 1854                                             |          | +         | +         |
| <i>Amphorides amphora</i> (Claparède and Lachmann) Kofoid and Campbell, 1929           |          | +         |           |
| <i>Amphorides quadrilineata</i> var. <i>minor</i> Jörgensen, 1924                      |          | +         |           |
| <i>Steenstrupiella steenstrupii</i> (Claparède and Lachmann) Kofoid and Campbell, 1929 |          | +         | +         |
| <i>Eutintinnus</i> sp. Kofoid and Campbell, 1939                                       |          |           | +         |
| <i>Eutintinnus elegans</i> (Jörgensen) Kofoid and Campbell, 1939                       |          | +         | +         |
| <i>Eutintinnus fraknoi</i> (Daday) Kofoid and Campbell, 1939                           |          | +         | +         |
| <i>Eutintinnus lusus-undae</i> (Entz sr.) Kofoid and Campbell, 1939                    |          | +         | +         |
| <i>Eutintinnus tubulosus</i> (Ostenfeld) Kofoid and Campbell, 1939                     |          | +         | +         |
| <i>Salpingella decurtata</i> Jörgensen, 1924                                           |          |           | +         |
| <i>Salpingella rotundata</i> Kofoid and Campbell, 1929                                 |          |           | +         |
| <i>Rhizodorus tagatzi</i> Strelkow and Wirketis, 1950                                  |          | +         | +         |
| <b>Total:</b>                                                                          |          | <b>34</b> | <b>28</b> |
